# Supplementary material
Source: Springer Nature journal article supplement (https://www.springermedizin.de/resource/supplementary/12883_2010_387_MOESM4_ESM.pdf/9455038)

**A**

mean VOP (mm Hg) vs. actual ICP (mm Hg)

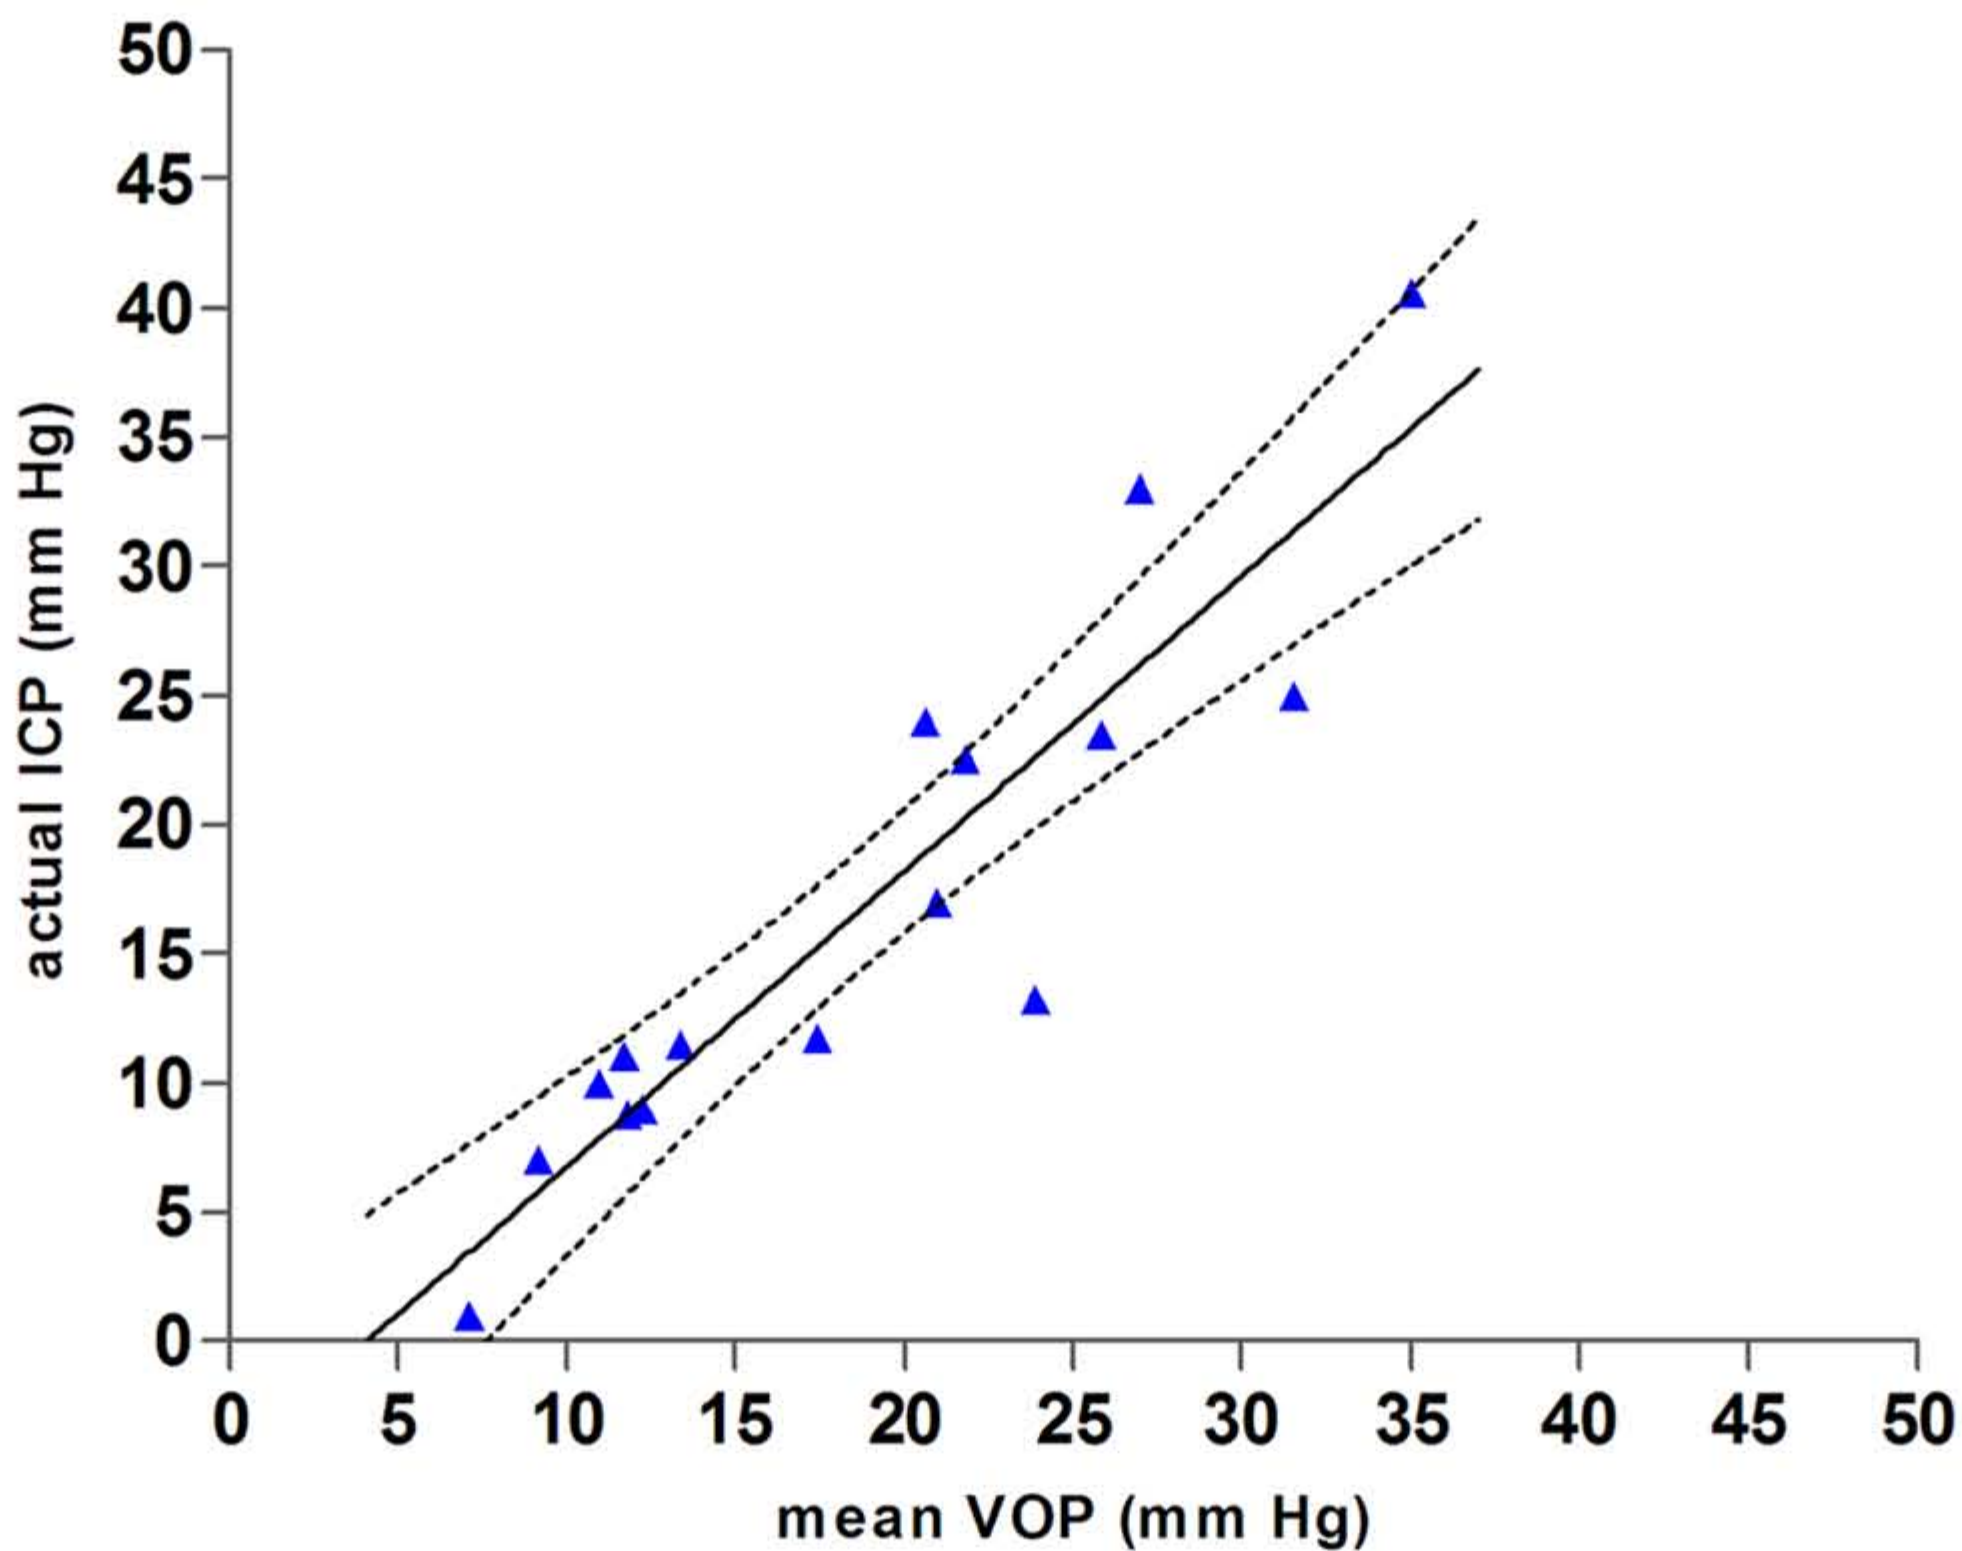**B**ICP elevation prediction  
VOP vs. ICP cut-off 15 mm Hg  
ROC curve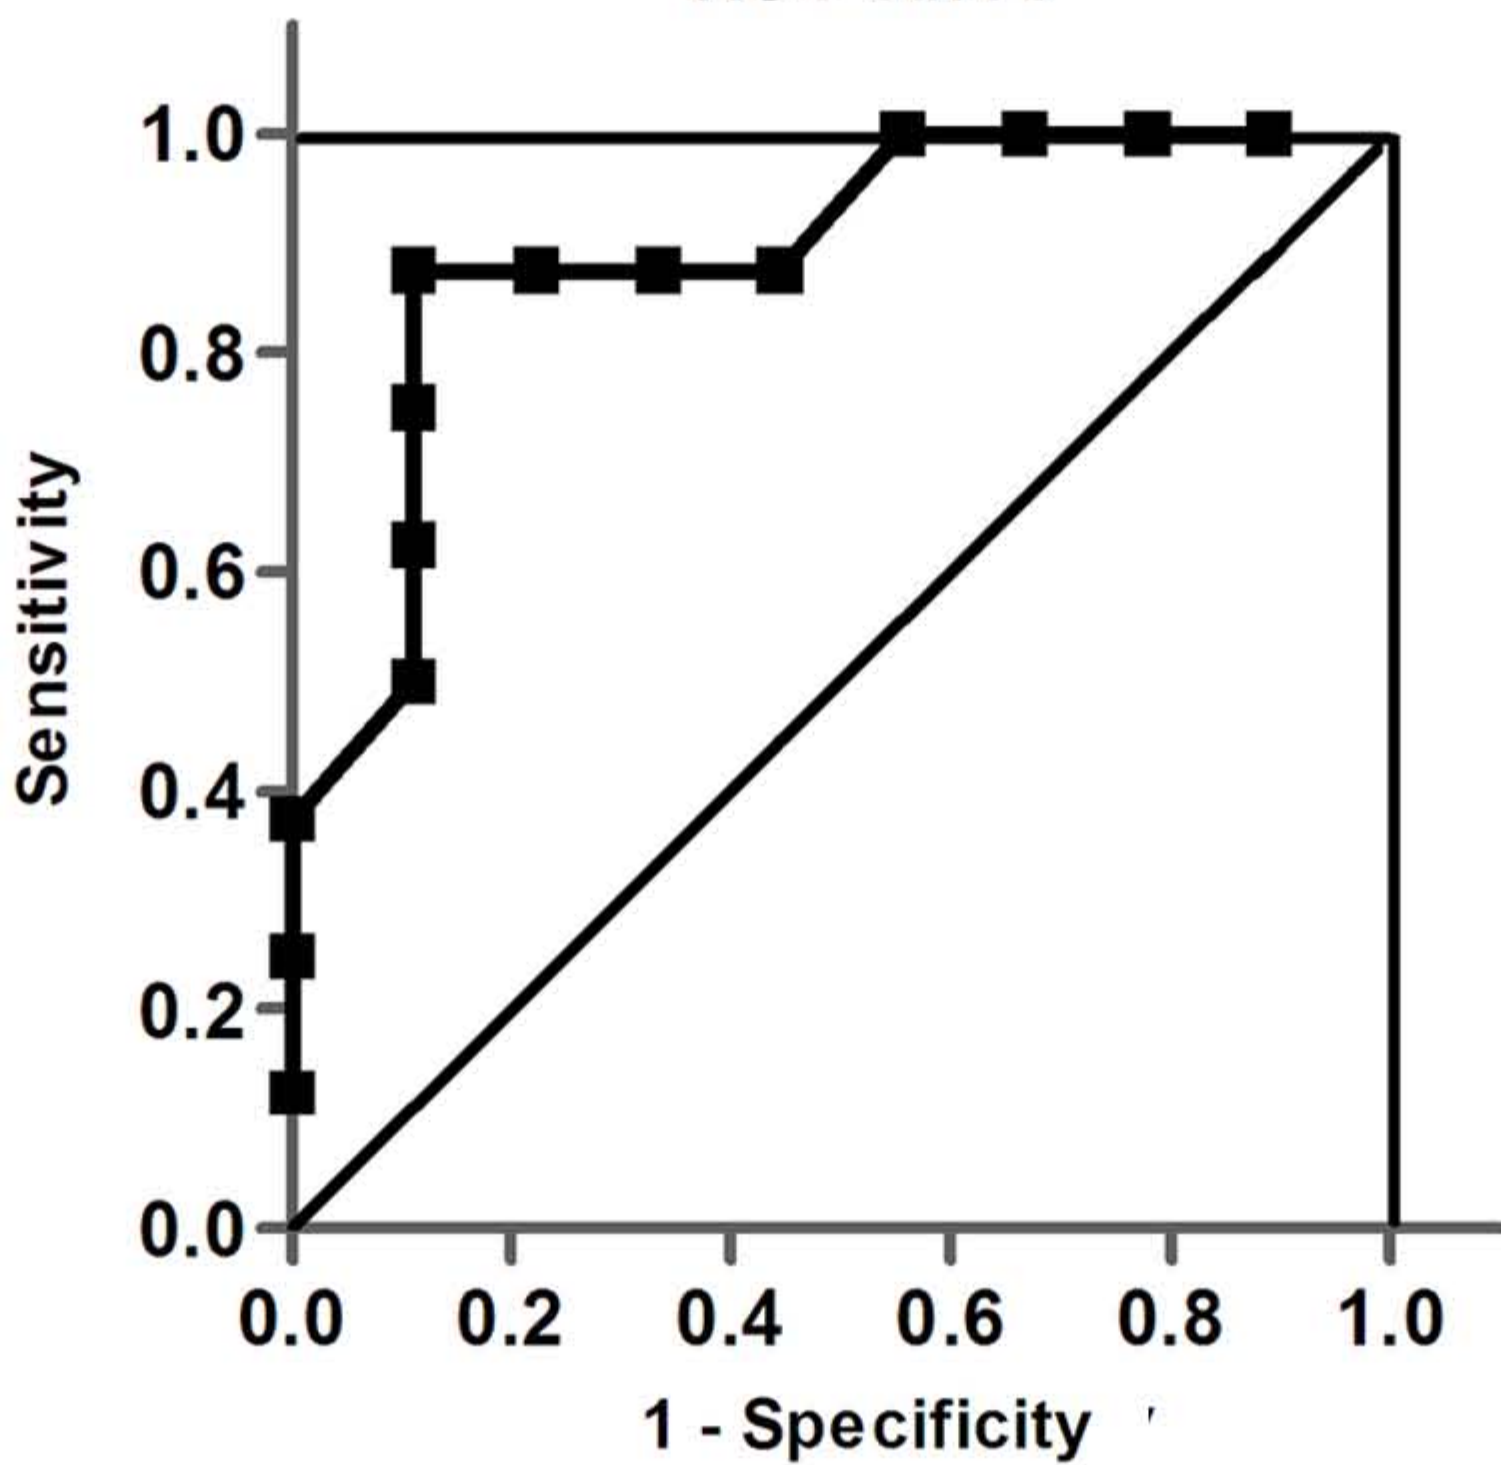

Supplement: MOESM4 [file 9455038]
